# Supplementary material for: Rapid Spread of Severe Fever with Thrombocytopenia Syndrome Virus by Parthenogenetic Asian Longhorned Ticks
Source: PubMed Central journal article supplement (PMC8798674; doi:10.3201/eid2802.211532), 2022-02
Supplement: 21-1532-Techapp-s1.pdf [file 21-1532-Techapp-s1.pdf]

# Rapid Spread of Severe Fever with Thrombocytopenia Syndrome Virus by Parthenogenetic Asian Longhorned Ticks

## Appendix

**Appendix Table 1.** Location and polyploid information for Asian longhorned tick samples, China

| Location                                           | No. ticks identified | No. Asian longhorned ticks identified | No. bisexual Asian longhorned ticks | No. parthenogenetic Asian longhorned ticks |
|----------------------------------------------------|----------------------|---------------------------------------|-------------------------------------|--------------------------------------------|
| Yuexi County, Anqing City, Anhui Province*         | 3                    | 3                                     | 0                                   | 3                                          |
| Nanqiao District, Chuzhou City, Anhui Province     | 24                   | 1                                     | 1                                   | 0                                          |
| Chaohu City, Hefei City, Anhui Province            | 2                    | 2                                     | 2                                   | 0                                          |
| Lujiang County, Hefei City, Anhui Province*†       | 10                   | 7                                     | 1                                   | 6                                          |
| Huoqiu County, Lu 'an City, Anhui Province*        | 1                    | 1                                     | 1                                   | 0                                          |
| Jinzhai County, Lu 'an City, Anhui Province*       | 14                   | 13                                    | 0                                   | 1                                          |
| Hanshan County, Maanshan City, Anhui Province      | 5                    | 5                                     | 0                                   | 2                                          |
| Chaoyang District, Beijing                         | 20                   | 13                                    | 0                                   | 3                                          |
| Haidian District, Beijing                          | 60                   | 60                                    | 6                                   | 0                                          |
| Huairou District, Beijing                          | 8                    | 8                                     | 2                                   | 0                                          |
| Mentougou District, Beijing                        | 50                   | 50                                    | 2                                   | 0                                          |
| Miyun District, Beijing                            | 30                   | 30                                    | 6                                   | 0                                          |
| Pinggu District, Beijing                           | 29                   | 29                                    | 6                                   | 0                                          |
| Shijingshan District, Beijing                      | 50                   | 50                                    | 6                                   | 0                                          |
| Shunyi District, Beijing                           | 27                   | 27                                    | 5                                   | 1                                          |
| Liangdang County, Longnan City, Gansu Province     | 20                   | 20                                    | 7                                   | 1                                          |
| Fuping County, Baoding City, Hebei Province        | 34                   | 33                                    | 6                                   | 0                                          |
| Xinglong County, Chengde City, Hebei Province      | 20                   | 10                                    | 3                                   | 0                                          |
| Haigang District, Qinhuangdao City, Hebei Province | 18                   | 9                                     | 2                                   | 0                                          |
| Jingxing County, Shijiazhuang City, Hebei Province | 20                   | 20                                    | 6                                   | 0                                          |
| Pingshan County, Shijiazhuang City, Hebei Province | 38                   | 30                                    | 5                                   | 0                                          |
| Luoning County, Luoyang City, Henan Province       | 34                   | 10                                    | 1                                   | 0                                          |
| Nanle County, Puyang City, Henan Province          | 21                   | 20                                    | 0                                   | 1                                          |
| Gushi County, Xinyang City, Henan Province*        | 5                    | 5                                     | 1                                   | 0                                          |
| Guangshan County, Xinyang City, Henan Province*    | 3                    | 3                                     | 0                                   | 3                                          |
| Luoshan County, Xinyang City, Henan Province*      | 56                   | 56                                    | 4                                   | 2                                          |
| Pingqiao District, Xinyang City, Henan Province*   | 8                    | 8                                     | 0                                   | 6                                          |
| Shangcheng County, Xinyang City, Henan Province*   | 20                   | 11                                    | 2                                   | 1                                          |
| Xinxian County, Xinyang City, Henan Province*      | 14                   | 6                                     | 0                                   | 6                                          |
| Gongyi City, Zhengzhou City, Henan Province        | 7                    | 7                                     | 2                                   | 0                                          |
| Hongan County, Huanggang City, Hubei Province*     | 51                   | 40                                    | 2                                   | 1                                          |
| Luotian County, Huanggang City, Hubei Province*    | 8                    | 6                                     | 5                                   | 0                                          |
| Macheng City, Huanggang City, Hubei Province*      | 6                    | 6                                     | 0                                   | 6                                          |
| Danjiangkou City, Shiyan City, Hubei Province      | 11                   | 1                                     | 1                                   | 0                                          |
| Guangshui City, Suizhou City, Hubei Province*      | 20                   | 20                                    | 0                                   | 2                                          |
| Jiangxia District, Wuhan City, Hubei Province      | 13                   | 10                                    | 6                                   | 0                                          |
| Nanzhang County, Xiangyang City, Hubei Province    | 9                    | 9                                     | 1                                   | 0                                          |
| Guidong County, Chenzhou City, Hunan Province      | 2                    | 1                                     | 0                                   | 1                                          |
| Hunchun City, Yanbian Prefecture, Jilin Province   | 50                   | 50                                    | 6                                   | 0                                          |
| Xuyi County, Huai'an City, Jiangsu Province        | 86                   | 50                                    | 0                                   | 4                                          |
| Donghai County, Lianyungang City, Jiangsu Province | 4                    | 1                                     | 1                                   | 0                                          |
| Jiangning District, Nanjing City, Jiangsu Province | 12                   | 12                                    | 1                                   | 0                                          |
| Liuhe District, Nanjing city, Jiangsu Province     | 12                   | 11                                    | 1                                   | 0                                          |
| Wuzhong District, Suzhou City, Jiangsu Province    | 8                    | 8                                     | 1                                   | 0                                          |
| Yixing City, Wuxi City, Jiangsu Province           | 12                   | 10                                    | 6                                   | 0                                          |
| Suichuan County, Ji 'an City, Jiangxi Province     | 21                   | 21                                    | 0                                   | 4                                          |
| Xiuyan County anshan City Liaoning Province        | 14                   | 10                                    | 5                                   | 0                                          |
| Jinzhou District, Dalian City, Liaoning Province   | 32                   | 22                                    | 6                                   | 0                                          |

| Location                                           | No. ticks identified | No. Asian longhorned ticks identified | No. bisexual Asian longhorned ticks | No. parthenogenetic Asian longhorned ticks |
|----------------------------------------------------|----------------------|---------------------------------------|-------------------------------------|--------------------------------------------|
| Lvshunkou District, Dalian City, Liaoning Province | 12                   | 8                                     | 3                                   | 3                                          |
| Zhuanghe City, Dalian City, Liaoning Province      | 13                   | 12                                    | 1                                   | 5                                          |
| Fengcheng City, Dandong City, Liaoning Province    | 27                   | 27                                    | 6                                   | 0                                          |
| Kuandian County, Dandong City, Liaoning Province   | 30                   | 10                                    | 3                                   | 0                                          |
| Penglai City, Yantai City, Shandong Province       | 31                   | 10                                    | 0                                   | 3                                          |
| Changdao County, Yantai City, Shandong Province†   | 16                   | 16                                    | 1                                   | 2                                          |
| High-tech District, Weihai City, Shandong Province | 34                   | 34                                    | 0                                   | 6                                          |
| Qingzhou City, Weifang City, Shandong Province     | 50                   | 50                                    | 1                                   | 2                                          |
| Laizhou City, Yantai City, Shandong Province       | 3                    | 1                                     | 1                                   | 0                                          |
| Lingchuan County, Jincheng City, Shanxi Province   | 27                   | 16                                    | 2                                   | 0                                          |
| Dingxiang County, Xinzhou City, Shanxi Province    | 9                    | 9                                     | 4                                   | 0                                          |
| Jishan County, Yuncheng City, Shanxi Province      | 33                   | 33                                    | 12                                  | 0                                          |
| Mian County, Hanzhong City, Shaanxi Province       | 50                   | 50                                    | 3                                   | 0                                          |
| Fu County, Yan 'an City, Shaanxi Province          | 11                   | 11                                    | 3                                   | 0                                          |
| Ganquan County, Yan'an City, Shaanxi Province      | 4                    | 3                                     | 2                                   | 0                                          |
| Songjiang District, Shanghai                       | 1                    | 1                                     | 0                                   | 1                                          |
| Cangxi County, Guanyuan City, Sichuan Province     | 60                   | 58                                    | 3                                   | 2                                          |
| Chaotian District, Guanyuan City, Sichuan Province | 41                   | 40                                    | 4                                   | 1                                          |
| Jizhou District, Tianjin                           | 25                   | 25                                    | 6                                   | 0                                          |
| Tengchong District, Baoshan City, Yunnan Province  | 8                    | 8                                     | 0                                   | 2                                          |
| Anji City, Huzhou City, Zhejiang Province          | 9                    | 7                                     | 5                                   | 0                                          |
| Dinghai District, Zhoushan City, Zhejiang Province | 5                    | 5                                     | 5                                   | 0                                          |
| Daishan County, Zhoushan City, Zhejiang Province   | 82                   | 25                                    | 1                                   | 0                                          |
| Shengsi County, Zhoushan City, Zhejiang Province†  | 31                   | 31                                    | 1                                   | 1                                          |
| Kaizhou District, Chongqing                        | 6                    | 3                                     | 0                                   | 3                                          |

\*Counties were located in Dabie Mountain.

†Parthenogenetic ticks were collected near the house of the patient who had severe fever with thrombocytopenia syndrome.

**Appendix Table 2.** Location and ploidy information for Asian longhorned tick samples

| Location                    | No. Asian longhorned tick DNA samples | Ploidy          |
|-----------------------------|---------------------------------------|-----------------|
| Oita Prefecture, Japan      | 3                                     | Bisexual        |
| Kagoshima Prefecture, Japan | 5                                     | Parthenogenetic |
| Jeju Province, South Korea  | 2                                     | Parthenogenetic |
| New Jersey, USA             | 1                                     | Parthenogenetic |
| New South Wales, Australia  | 2                                     | Parthenogenetic |
| Queensland, Australia       | 2                                     | Parthenogenetic |
| Okayama Prefecture, Japan   | 5                                     | Parthenogenetic |
| South Island, New Zealand   | 1                                     | Parthenogenetic |

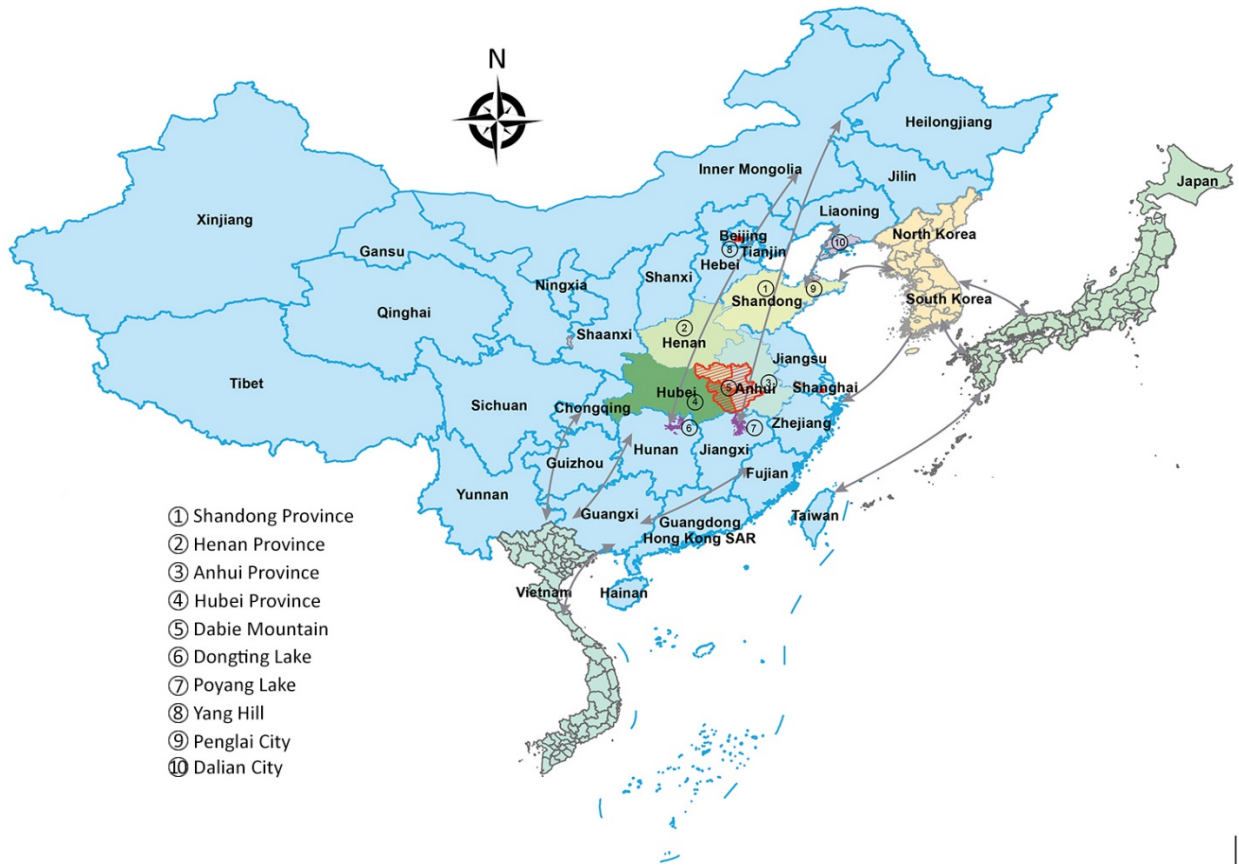

**Appendix Figure 1.** Locations analyzed in this study, eastern Asia. Arrows indicate bird migration routes.

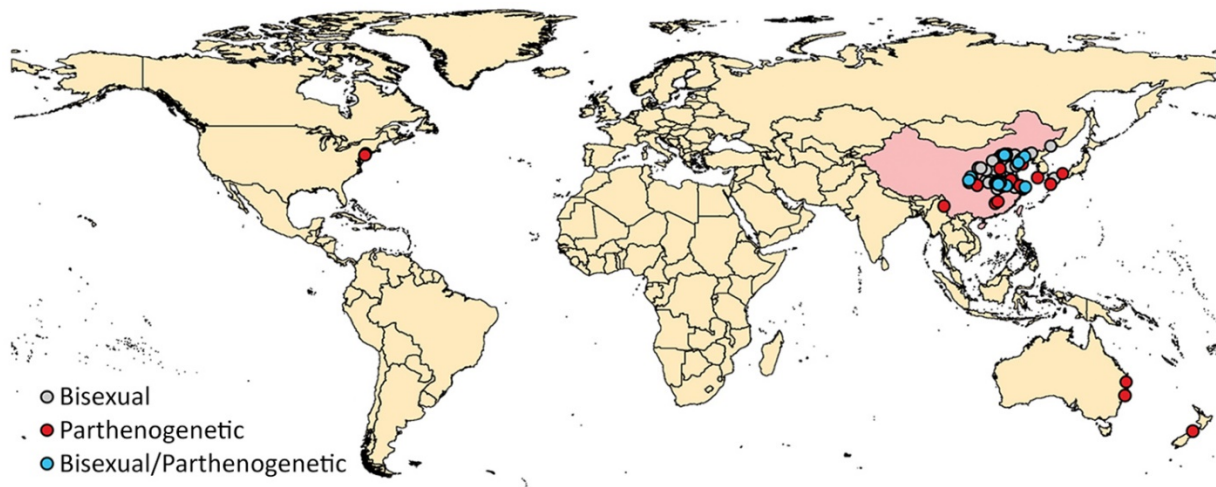

**Appendix Figure 2.** Bisexual and parthenogenetic Asian longhorned ticks collected in the Asia–Pacific area. Red dots indicate parthenogenetic ticks; gray dots indicate bisexual ticks, and blue dots indicate parthenogenetic and bisexual ticks.

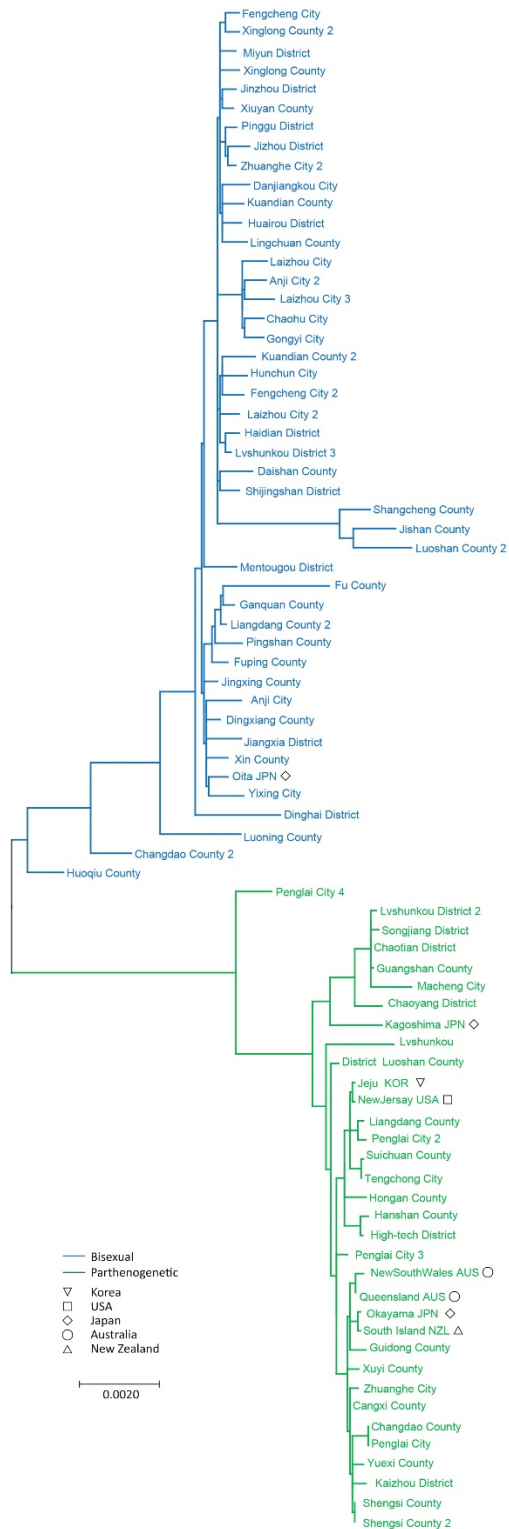

**Appendix Figure 3.** Maximum-likelihood tree established with the mitochondrial genomes of Asian longhorned ticks collected in the Asian–Pacific region. Multiple ticks from the same county are indicated by the numbers. Scale bar indicates nucleotide substitutions per site.

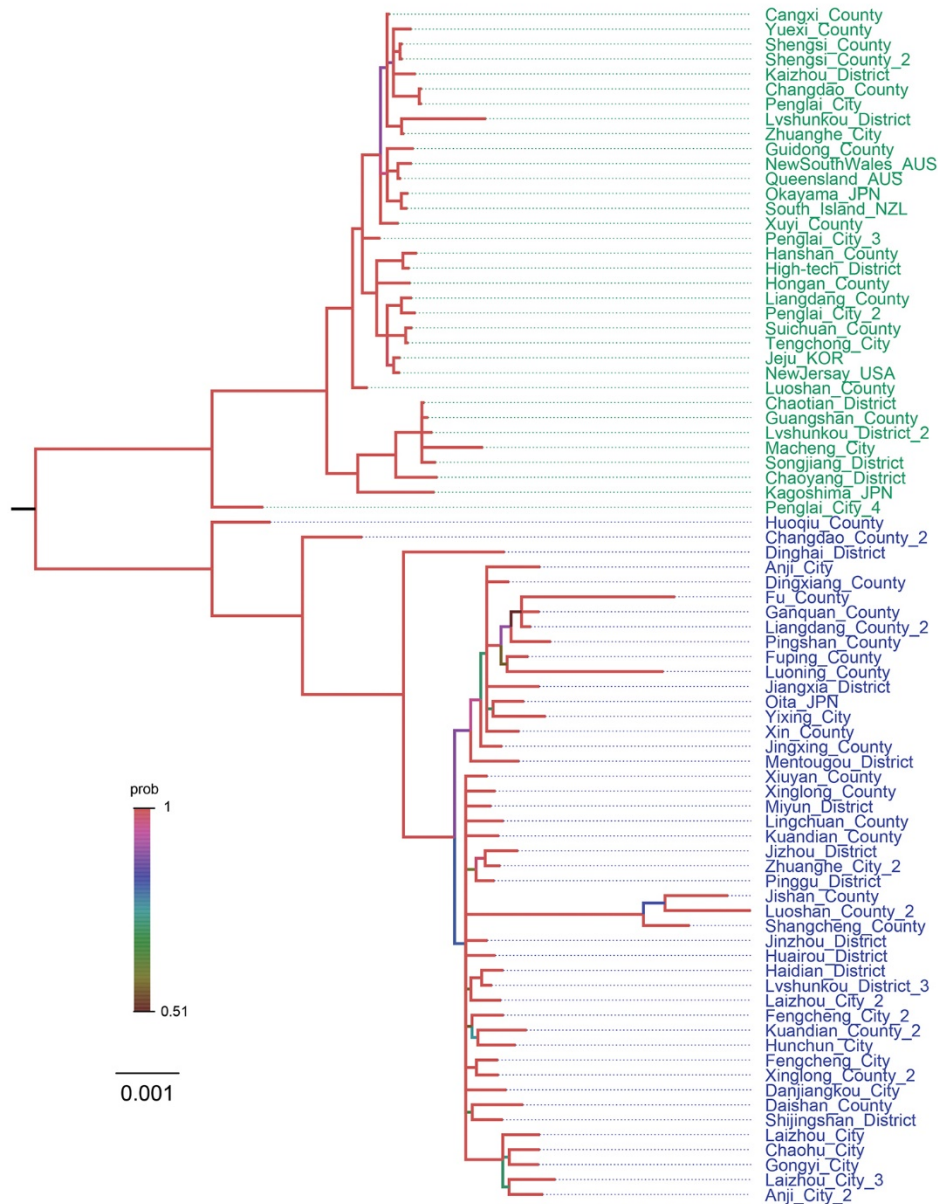

**Appendix Figure 4.** Bayesian phylogenetic tree of parthenogenetic (green) and bisexual (blue) Asian longhorned ticks. Colors of the branches indicate posterior probabilities. Scale bar indicates nucleotide substitutions per site. This tree was constructed by using MrBays-3.2.7 (<http://nbisweden.github.io/MrBayes/index.html>) with 1,500,000 generations, and the average SD of split frequencies of the tree is <0.01. prob, probability.

|                           | 8490           | 8500           |
|---------------------------|----------------|----------------|
| <b>Chaohu City</b>        | AAGTTTTAATAAAA | TAAATTAAATTATT |
| <b>Gongyi City</b>        | AAGTTTTAATAAAA | TAAATTAAATTATT |
| <b>Huoqiu County</b>      | AAGTTTTAATAAAA | TAAATTAAATTATT |
| <b>Mentougou District</b> | AAGTTTTAATAAAA | TAAATTAAATTATT |
| <b>Laizhou City</b>       | AAGTTTTAATAAAA | TAAATTAAATTATT |
| <b>Luoshan County</b>     | AAGTTTTAATAAAA | -AAATTAAATTATT |
| <b>Chaoyang District</b>  | AAGTTTTAATAAAA | -AAATTAAATTATT |
| <b>Shengsi County</b>     | AAGTTTTAATAAAA | -AAATTAAATTATT |
| <b>Guidong County</b>     | AAGTTTTAATAAAA | -AAATTAAATTATT |
| <b>Chaotian District</b>  | AAGTTTTAATAAAA | -AAATTAAATTATT |

**Appendix Figure 5.** Mitochondrial genome alignment between parthenogenetic and bisexual Asian longhorned tick populations. The upper 5 sequences were from bisexual ticks, and the lower 5 sequences were from parthenogenetic ticks. Blue rectangle indicates nucleotides analyzed. Red dashes indicate nucleotide deletions.

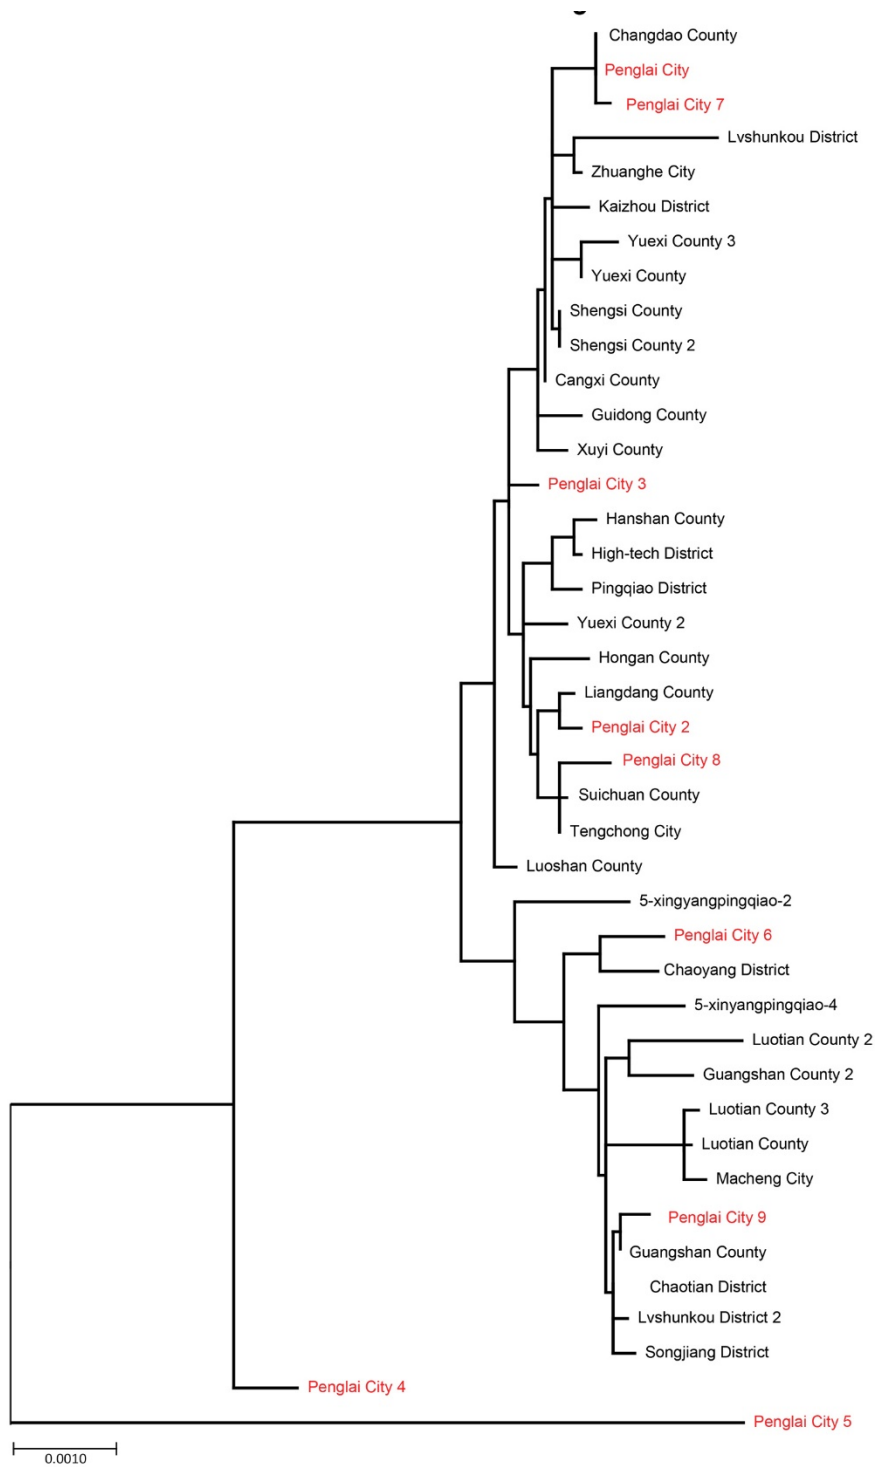

**Appendix Figure 6.** Phylogenetic analysis of parthenogenetic ticks collected from Penglai City (red) and samples from 15 provinces in China. Maximum-likelihood tree established with the mitochondrial genomes of ticks. Multiple ticks from the same county are indicated by numbers. Scale bar indicates nucleotide substitutions per site.
